# Supplementary material for: Computational Investigations of Selected Enzymes From Two Iron and {\alpha}-ketoglutarate-Dependent Families.
Source: Royal Society of Chemistry journal article supplement (doi:10.1039/d1cp03800a), 2021-08-24
Supplement: d1cp03800a1.pdf [file d1cp03800a1.pdf]

**Supplemental Information for:**  
**Computational Investigations of Two Iron and**  
 **$\alpha$ -ketoglutarate-Dependent Family Enzymes: Structural and Electronic**  
**Level Insights**

Madison B. Berger, Alice R. Walker,  
Erik Antonio Vázquez-Montelongo and G. Andrés Cisneros\*

**Methodology for the QM/MM ALKBH2 and ALKBH3 Calculations**

QM/MM single point calculations were performed for each critical point structure (reactant, transition state and product) for ALKBH2 and ALKBH3. The  $\omega$ B97XD functional, and the 6-31G(d,p) basis set were used for the atoms in the QM region. The pseudo-bond approach was used for the bonds that bridge the QM and MM regions.<sup>1</sup> A modified version of the AMBER ff99SB force field including the parameters of the damaged bases was used to model the alkylated double and single stranded substrate and reactive site for ALKBH2 and ALKBH3 MM regions, respectively. The TiP3P force field was used to model the MM water molecules. Gaussian16 and TINKER8 software packages were used with LICHEM 1.1.<sup>2-5</sup>

For the QM single point calculations, the  $\omega$ B97XD functional, 6-31G(d,p) basis set and the pseudo-bond approach for the cleaved bonds between the QM and the MM regions was used; each QM cluster was embedded in the electrostatic field produced by the MM region (ALKBH2/ALKBH3 + water). Mulliken spin densities for Fe were extracted from the Gaussian16 output file and the electron densities from the formatted check point file employing the Multiwfn 3.8 software package.<sup>6</sup>

## References

- [1] J. M. Parks, H. Hu, A. J. Cohen and W. Yang, *J. Chem. Phys.*, 2008, **129**, 154106.
- [2] M. Frisch, G. Trucks, H. Schlegel, G. Scuseria, M. Robb, J. Cheeseman, G. Scalmani, V. Barone, G. Petersson, H. Nakatsuji, X. Li, M. Caricato, A. Marenich, J. Bloino, B. Janesko, R. Gomperts, B. Mennucci, H. Hratchian, J. Ortiz, A. Izmaylov, J. Sonnenberg, D. Williams-Young, F. Ding, F. Lipparini, F. Egidi, J. Goings, B. Peng, A. Petrone, T. Henderson, D. Ranasinghe, V. Zakrzewski, J. Gao, N. Rega, G. Zheng, W. Liang, M. Hada, M. Ehara, K. Toyota, R. Fukuda, J. Hasegawa, M. I. nad T. Nakajima, Y. Honda, O. Kitao, H. Nakai, T. Vreven, K. Throssell, J. Montgomery, J. Peralta, F. Ogliaro, M. Bearpark, J. Heyd, E. Brothers, K. Kudin, V. Staroverov, T. Keith, R. Kobayashi, J. Normad, K. Raghavachari, A. Rendell, J. Burant, S. Iyengar, J. Tomasi, M. Cossi, K. Morokuma, O. Farkas, J. Foresman and D. Fox, *Gaussian16 Revision C.01*, 2016, Gaussian Inc. Wallingford, CT.
- [3] J. A. Rackers, Z. Wang, C. Lu, M. L. Laury, L. Lagardère, M. J. Schnieders, J.-P. Piquemal, P. Ren and J. W. Ponder, *J. Chem. Theory Comput.*, 2018, **14**, 5273–5289.
- [4] E. Kratz, A. Walker, L. Lagardeère, F. Lipparini, J. Piquemal and G. A. Cisneros, *J. Comp. Chem.*, 2016, **37**, 1019–1029.
- [5] H. Gökcan, E. Vazquez-Montelongo and G. Cisneros, *J. Chem. Theo. Comput.*, 2019, **15**, 3056–3065.
- [6] T. Lu and F. Chen, *J. Comput. Chem.*, 2012, **33**, 580–592.
